# Supplementary material for: A disposable electrode modified with metal orthovanadate and sulfur-reduced graphene oxide for electrochemical detection of anti-rheumatic drug
Source: Royal Society of Chemistry journal article supplement (doi:10.1039/d1nj02775a), 2021-01-01
Supplement: d1nj02775a1.pdf [file d1nj02775a1.pdf]

### **Supporting information**

#### **Disposable electrode modified with metal orthovanadate and sulfur-reduced graphene oxide for electrochemical detection of sulfasalazine**

**Umamaheswari Rajaji,<sup>a</sup> Arya Nair J.S.,<sup>b</sup> Shen-Ming Chen,<sup>a,\*</sup> K. Y. Sandhya,<sup>b,\*</sup> Razan A. Alshgari,<sup>c</sup> Ting-Yu Jiang<sup>a,d</sup>**

<sup>a</sup>Department of Chemical Engineering and Biotechnology, National Taipei University of Technology, No. 1, Section 3, Chung-Hsiao East Road, Taipei 106, Taiwan, ROC.

<sup>b</sup>Department of Chemistry, Indian Institute of Space Science and Technology, Thiruvananthapuram, Kerala 695 547, India.

<sup>c</sup>Chemistry Department, College of Science, King Saud University, Riyadh 11451, Saudi Arabia.

<sup>d</sup>Korea University of Technology and Education, Cheonan-si 31253, Chungcheongnam-do, Republic of Korea.

#### **Corresponding Authors:**

\*SMC, E-mail: [umachemist24@gmail.com](mailto:umachemist24@gmail.com), [smchen1957@gmail.com](mailto:smchen1957@gmail.com); Tel.: +886-2-27017147;

Fax.: +886-2-27025238. \*KYS, E-mail: [sandhya@iist.ac.in](mailto:sandhya@iist.ac.in)

## EXPERIMENTAL SECTION

### Reagents and Chemicals

Cerium (III) nitrate hexahydrate ( $\text{Ce}(\text{NO}_3)_3 \cdot 6\text{H}_2\text{O}$ , ACS reagent,  $\geq 99.0\%$ ),  $\text{NH}_4\text{VO}_3$ , and other chemicals were bought from Sigma-Aldrich, USA. Potassium ferricyanide ( $\text{K}_3[\text{Fe}(\text{CN})_6]$ ), potassium ferrocyanide ( $\text{K}_4[\text{Fe}(\text{CN})_6]$ ), and potassium chloride (KCl) were analar grade commercial products, used as received. For those experiments in which supporting electrolyte was present, KCl was added to remain a 5.0 mM concentration. The electrolyte, 0.05 M phosphate buffer saline (PBS, pH 7.0) was prepared by mixing, sodium mono-hydrogen phosphate ( $\text{Na}_2\text{HPO}_4$ ) and sodium dihydrogen phosphate ( $\text{NaH}_2\text{PO}_4$ ) in an aqueous medium. The pH of the electrolyte solution was adjusted by using aqueous  $\text{H}_2\text{SO}_4$  (0.5 M) and NaOH (2.0 M). The entire experiments were done with freshly prepared Milli-Q water ( $18.2 \text{ MQ cm}^{-1}$ , specific resistivity) collected from Millipore Water System.

### Characterizations

The nanostructure, composition and the morphological characterization of CVO@SRG composite was evaluated by the high resolution-transmission electron microscopy (HR-TEM) H-7600, Hitachi, (Japan). The chemical composition and elemental percentage were assessed through energy-dispersive X-ray (EDX) which affiliated with HR-TEM. The crystalline phase of as prepared samples was analyzed by X-ray diffraction (XRD) XPERT-PRO (PAN analytical B.V. The Netherlands) diffractometer with Cu K radiation ( $\lambda = 1.54 \text{ \AA}$ ). The oxidation state and the composition of the materials was scrutinized by X-ray photoelectron spectroscopy (XPS, Thermo ESCALAB 250 instrument).

## Electrochemical Apparatus

The cyclic voltammetry (CV) and differential pulse voltammetry (DPV) experiments were carried out on a CHI 1205A analyzer electrochemical workstation (CH, USA). A conventional three-electrode system consisting of an Ag/AgCl (saturated KCl) electrode as the reference electrode, a platinum wire as the auxiliary electrode, and a CVO@SRG modified SPCE as the WE were used (Scheme 2).

## SGR preparation

The graphene oxide (GO) was prepared by modified Hummers method from the graphite powder. Then, 10 mg of as-prepared GO was re-dispersed in 10 mL of de-ionized water and this suspension was ultrasonicated for 40 min. Further, the 5 mL of 1 M Na<sub>2</sub>S was added to the suspension. Then, the reaction mixture was ultrasonicated for 2 h at 100 °C. Now the graphene oxide turned to S doped reduced graphene oxide sheets (SRG) and the SRG was separated by centrifugation.

## CVO crystal structure information

=====

Title            Ce O<sub>4</sub> V

Lattice type     I

Space group name   I 41/a m d

Space group number   141

Setting number     1

Lattice parameters

| a       | b       | c       | alpha   | beta    | gamma   |
|---------|---------|---------|---------|---------|---------|
| 7.34000 | 7.34000 | 6.47000 | 90.0000 | 90.0000 | 90.0000 |

Unit-cell volume = 348.575135 Å<sup>3</sup>

Structure parameters

|   |    |     | x       | y       | z       | Occ.  | U     | Site | Sym. |
|---|----|-----|---------|---------|---------|-------|-------|------|------|
| 1 | O  | O1  | 0.00000 | 0.19000 | 0.35000 | 1.000 | 0.020 | 16h  | .m.  |
| 2 | Ce | Ce1 | 0.00000 | 0.00000 | 0.00000 | 1.000 | 0.020 | 4a   | -4m2 |
| 3 | V  | V1  | 0.00000 | 0.00000 | 0.50000 | 1.000 | 0.020 | 4b   | -4m2 |

---



---

Number of polygons and unique vertices on isosurface = 0 (0)

107 atoms, 144 bonds, 23 polyhedra; CPU time = 3 ms

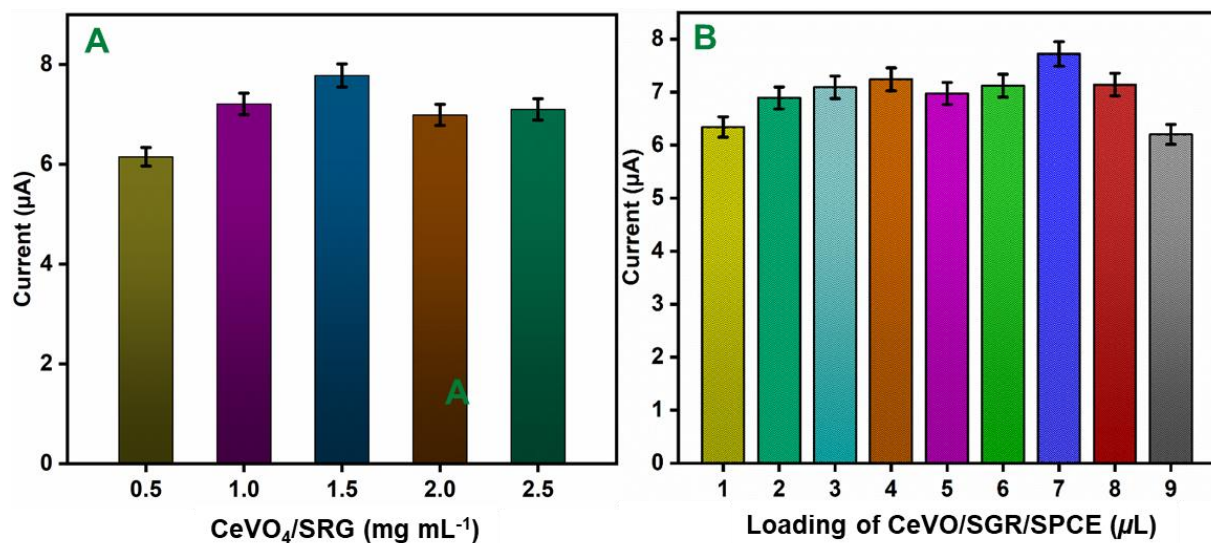

**Fig. S1. Optimization of the electrochemical experiments (A): effect of concentrations of nanocomposite, (B): effect of catalyst.**

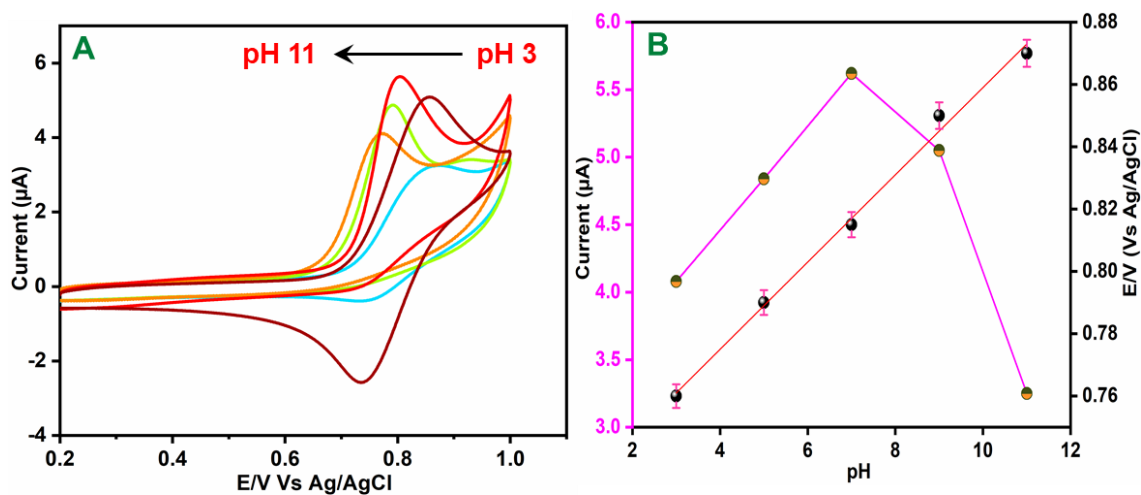

**Fig. S2. (A-B) Optimization of the electrochemical experiments effect of pH.**

Table 1. Analytical parameters for the determination of SSZ at CVO/SRG/SPCE with previous reports [14,17,19,32-36].

|                                                       |                                                            |
|-------------------------------------------------------|------------------------------------------------------------|
| <b>SbFE</b>                                           | Antimony film electrode                                    |
| <b>BiNP-CNT</b>                                       | Bismuth nanoparticle carbon nanotube                       |
| <b>MWCNTCOOH</b>                                      | Functionalized multiwalled carbon nanotube                 |
| <b>GO/Fe<sub>3</sub>O<sub>4</sub>@SiO<sub>2</sub></b> | Graphene oxide/magnetic nanoparticle at<br>silicon dioxide |
| <b>CD/RGO</b>                                         | Beta cyclodextrin –reduced graphene oxide<br>composite     |
| <b>NiO</b>                                            | Nickel oxide nanoparticle                                  |

|                    |                                                            |
|--------------------|------------------------------------------------------------|
| <b>NiO/CNT</b>     | Nickel oxide-carbon nanotube nano<br>composite             |
| <b>PtNPs/SWCNT</b> | Platinum nanoparticles on single walled<br>carbon nanotube |
